# Supplementary material for: Repetitive Long-Term Hyperbaric Oxygen Treatment (HBOT) Administered after Experimental Traumatic Brain Injury in Rats Induces Significant Remyelination and a Recovery of Sensorimotor Function
Source: PubMed Central journal article supplement (PMC4029808; doi:10.1371/journal.pone.0097750), 2014-05-21
Supplement: pone.0097750.s004.pdf [file pone.0097750.s004.pdf]

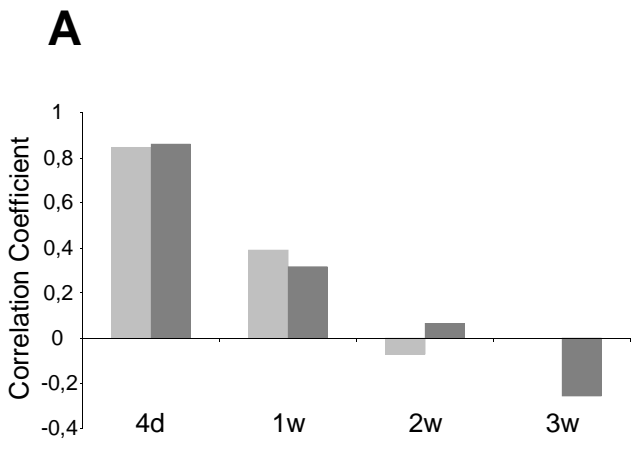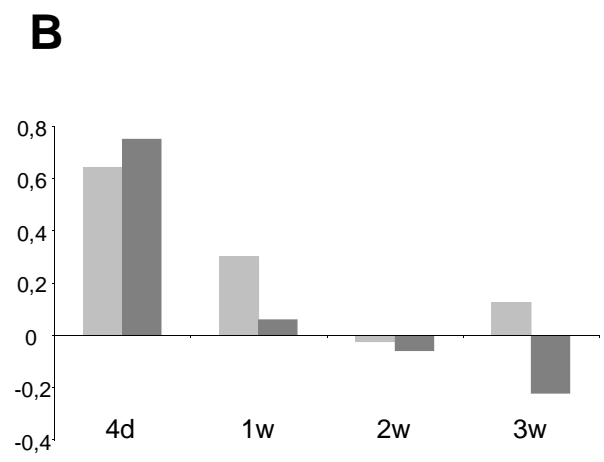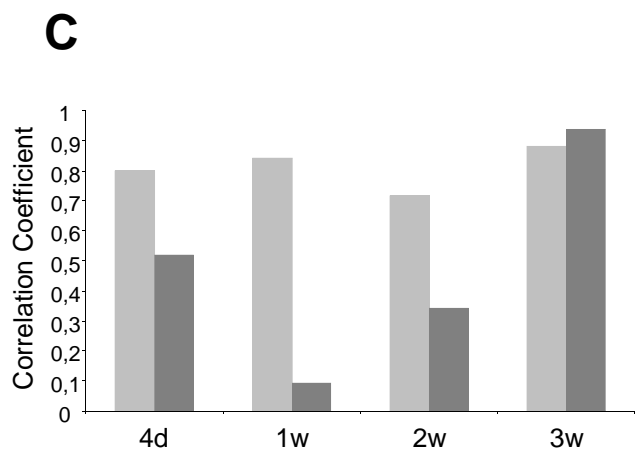

Figure S4
