# Supplementary material for: Repetitive Long-Term Hyperbaric Oxygen Treatment (HBOT) Administered after Experimental Traumatic Brain Injury in Rats Induces Significant Remyelination and a Recovery of Sensorimotor Function
Source: PubMed Central journal article supplement (PMC4029808; doi:10.1371/journal.pone.0097750), 2014-05-21
Supplement: pone.0097750.s005.pdf [file pone.0097750.s005.pdf]

|                         | 4 days |        | 3 weeks |        |
|-------------------------|--------|--------|---------|--------|
|                         | - HBOT | + HBOT | - HBOT  | + HBOT |
| Epiduralhaematoma       | 1/6    | 2/10   | 0/6     | 1/10   |
| Atrophy left ventricle  | 1/6    | 1/10   | 2/6     | 4/10   |
| Atrophy right ventricle | 1/6    | 2/10   | 4/6     | 5/10   |
| Cortical destruction    | 1/6    | 4/10   | 5/6     | 6/10   |

Table S1
